# Supplementary material for: From Methane to Methanol: Pd-iC-CeO2 Catalysts Engineered for High Selectivity via Mechanochemical Synthesis
Source: PubMed Central journal article supplement (PMC11440493; doi:10.1021/jacs.4c04815), 2024-08-15
Supplement: ja4c04815_si_001.pdf [file ja4c04815_si_001.pdf]

## Supplemental Information

### From Methane to Methanol: Pd-iC-CeO<sub>2</sub> Catalysts Engineered for High Selectivity via Mechano-Chemical Synthesis

Juan D. Jiménez<sup>1</sup>, Pablo G. Lustemberg<sup>2\*</sup>, Maila Danielis<sup>3</sup>, Estefanía Fernández-Villanueva<sup>2,4</sup>, Sooyeon Hwang<sup>5</sup>, Iradwikanari Waluyo<sup>6</sup>, Adrian Hunt<sup>6</sup>, Dominik Wierzbicki<sup>6</sup>, Jie Zhang<sup>7</sup>, Long Qi<sup>7</sup>, Alessandro Trovarelli<sup>3</sup>, José A. Rodríguez<sup>1,8</sup>, Sara Colussi<sup>3</sup>, M. Verónica Ganduglia-Pirovano<sup>2\*</sup>, and Sanjaya D. Senanayake<sup>1\*</sup>

<sup>1</sup> Chemistry Division, Brookhaven National Laboratory, Upton, NY, 11973, USA

<sup>2</sup> Instituto de Catálisis y Petroleoquímica, CSIC, C/Marie Curie 2, 28049 Madrid, Spain

<sup>3</sup> Polytechnic Department, University of Udine and INSTM, Via del Cottonificio 108, 33100 Udine, Italy

<sup>4</sup> Universitat Politècnica de València, Camí de Vera s/n, 46022, València, Spain

<sup>5</sup> Center for Functional Nanomaterials, Brookhaven National Laboratory, Upton, NY, 11973, USA

<sup>6</sup> National Synchrotron Light Source II, Brookhaven National Laboratory, Upton, New York 11973, USA

<sup>7</sup> Ames National Laboratory, Iowa State University, Ames, Iowa, 50011, USA

<sup>8</sup> Department of Chemistry, State University of New York Stony Brook, Stony Brook, NY 11794, USA

\*Corresponding Email: [p.lustemberg@csic.es](mailto:p.lustemberg@csic.es)

\*Corresponding Email: [vgp@icp.csic.es](mailto:vgp@icp.csic.es)

\*Corresponding Email: [ssenanay@bnl.gov](mailto:ssenanay@bnl.gov)

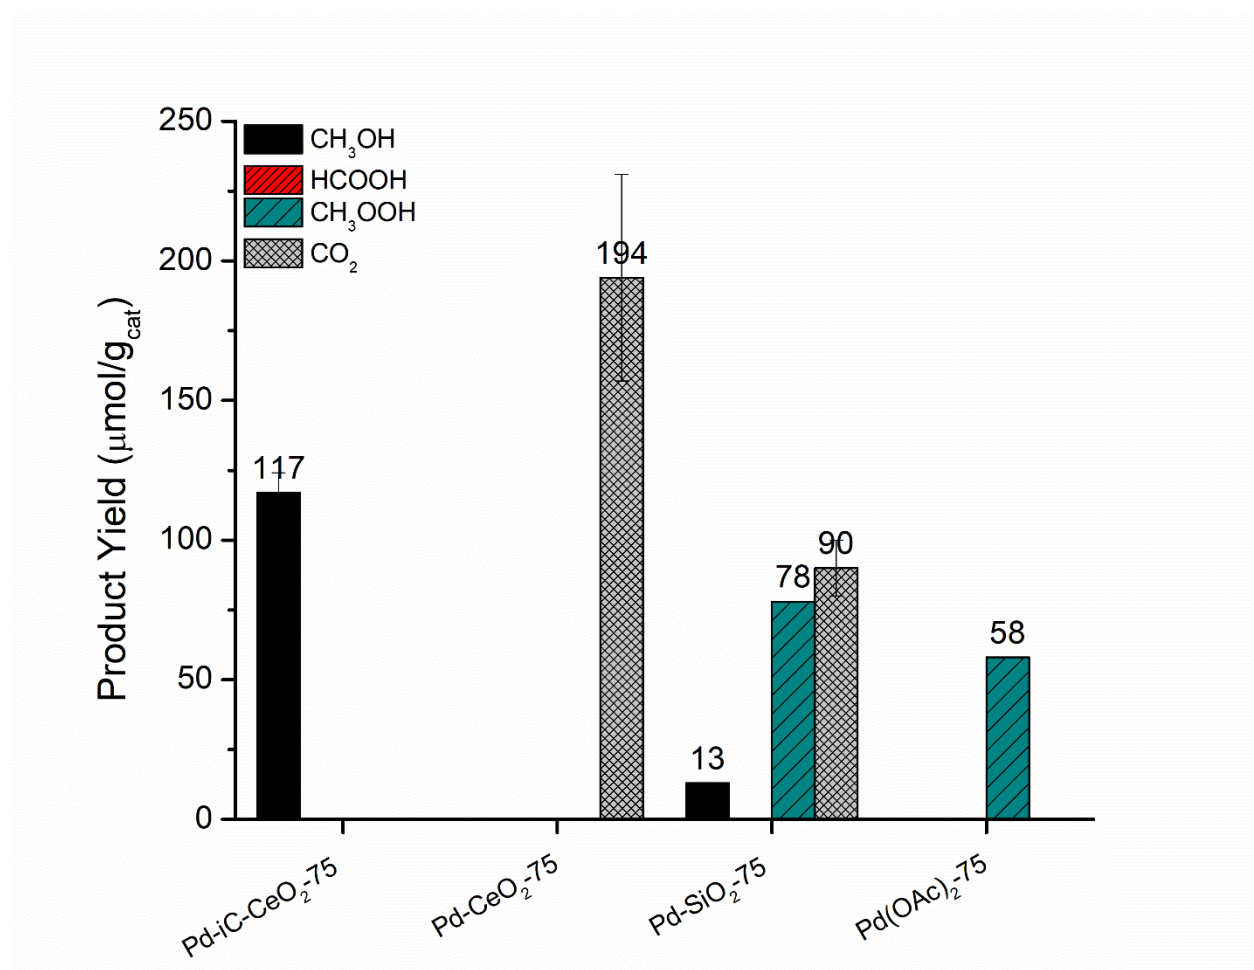

Figure S1: Methane to methanol product distribution for various Pd reference materials. Conditions: 75 °C reaction temperature, 15 mL 0.5M H<sub>2</sub>O<sub>2</sub> (aq) solution, 25 mg catalyst (1 mg equivalent Pd loading), 800 rpm, 20 bar total initial pressure (20% CH<sub>4</sub>, balance Ar).

Table S1: Product distribution and associated methane conversion for Pd-iC-CeO<sub>2</sub>

| Temperature (°C) | Product Yield (μmol) |       |                 | Oxygenate Selectivity (%) | CH <sub>4</sub> Conversion (%) |
|------------------|----------------------|-------|-----------------|---------------------------|--------------------------------|
|                  | CH <sub>3</sub> OH   | HCOOH | CO <sub>2</sub> |                           |                                |
| 75               | 2.9                  | 0     | 0               | 100                       | 0.1                            |
| 90               | 1.6                  | 0     | 3.4             | 32                        | 0.2                            |
| 100              | 3.2                  | 0.4   | 2.7             | 57                        | 0.3                            |
| 110              | 4.7                  | 4.1   | 4.5             | 66                        | 0.5                            |
| 125              | 0.4                  | 0     | 7.7             | 6                         | 0.3                            |

Reaction Conditions: 25 mg catalyst, 20 atm total pressure (20% CH<sub>4</sub>, balance Ar), 2.46 mmol initial methane charge, 15 mL 0.5 M H<sub>2</sub>O<sub>2</sub> (aq), 800 rpm mixing.

Table S2. Methane to methanol comparison to state-of-the-art catalytic materials with Pd-iC-CeO<sub>2</sub>

| Catalyst                          | Loading              | Reaction Media                               | CH <sub>4</sub> (bar) | Temp. (°C) | Oxy. Yield (μmol/g <sub>cat</sub> ) | Oxy. Selectivity (%) | Ref              |
|-----------------------------------|----------------------|----------------------------------------------|-----------------------|------------|-------------------------------------|----------------------|------------------|
| AuPd/TiO <sub>2</sub>             | 2.5wt%Au<br>2.5wt%Pd | 0.5 M H <sub>2</sub> O <sub>2</sub>          | 30                    | 50         | 1458                                | 90                   | 1                |
| Rh/ZrO <sub>2</sub>               | 0.3wt%Rh             | 0.5 M H <sub>2</sub> O <sub>2</sub>          | 28.5                  | 70         | 52.47                               | 75                   | 2                |
| IrCuPd/ZSM5                       | 0.5wt%Rh             | O <sub>2</sub> +CO                           | 20                    | 150        | 1490                                | 85                   | 3                |
| CuFAU                             | 9.3wt%Cu             | O <sub>2</sub> (g)                           | 15                    | 360        | 360                                 | 93                   | 4                |
| AuPd/ZSM-5                        | 3.2wt%Au<br>1.7wt%Pd | <i>in situ</i> H <sub>2</sub> O <sub>2</sub> | 0.48                  | 70         | 4731                                | 92                   | 5                |
| Pd <sub>1</sub> /TiO <sub>2</sub> | 0.2wt%Pd             | H <sub>2</sub> O <sub>2</sub><br>hv (photo)  | 20                    | 25         | 180                                 | 94                   | 6                |
| <b>Pd-iC-CeO<sub>2</sub></b>      | <b>4wt%Pd</b>        | <b>0.5 M H<sub>2</sub>O<sub>2</sub></b>      | <b>4</b>              | <b>75</b>  | <b>112</b>                          | <b>100</b>           | <b>This Work</b> |
| <b>Pd-iC-CeO<sub>2</sub></b>      | <b>4wt%Pd</b>        | <b>0.5 M H<sub>2</sub>O<sub>2</sub></b>      | <b>4</b>              | <b>110</b> | <b>350</b>                          | <b>65</b>            | <b>This Work</b> |

1. Ab Rahim, M. H.; Armstrong, R. D.; Hammond, C.; Dimitratos, N.; Freakley, S. J.; Forde, M. M.; Morgan, D. J.; Lalev, G.; Jenkins, R. L.; Lopez-Sanchez, J. A.; et al. Low temperature selective oxidation of methane to methanol using titania supported gold palladium copper catalysts. *Catal. Sci. Technol.* **2016**, *6* (10), 3410-3418.
2. Kwon, Y.; Kim, T. Y.; Kwon, G.; Yi, J.; Lee, H. Selective Activation of Methane on Single-Atom Catalyst of Rhodium Dispersed on Zirconia for Direct Conversion. *Journal of the American Chemical Society* **2017**, *139* (48), 17694-17699.
3. Li, M.; Shan, J.; Giannakakis, G.; Ouyang, M.; Cao, S.; Lee, S.; Allard, L. F.; Flytzani-Stephanopoulos, M. Single-step Selective Oxidation of Methane to Methanol in the Aqueous Phase on Iridium-based Catalysts. *Appl. Catal., B* **2021**, 120124
4. Sushkevich, V. L.; van Bokhoven, J. A. Methane-to-Methanol: Activity Descriptors in Copper-Exchanged Zeolites for the Rational Design of Materials. *ACS Catal.* **2019**, *9* (7), 6293-6304
5. Jin, Z.; Wang, L.; Zuidema, E.; Mondal, K.; Zhang, M.; Zhang, J.; Wang, C.; Meng, X.; Yang, H.; Mesters, C. Hydrophobic zeolite modification for in situ peroxide formation in methane oxidation to methanol. *Science* **2020**, *367* (6474), 193-197
6. Ab Rahim, M. H.; Armstrong, R. D.; Hammond, C.; Dimitratos, N.; Freakley, S. J.; Forde, M. M.; Morgan, D. J.; Lalev, G.; Jenkins, R. L.; Lopez-Sanchez, J. A.; et al. Low temperature selective oxidation of methane to methanol using titania supported gold palladium copper catalysts. *Catal. Sci. Technol.* **2016**, *6* (10), 3410-3418.

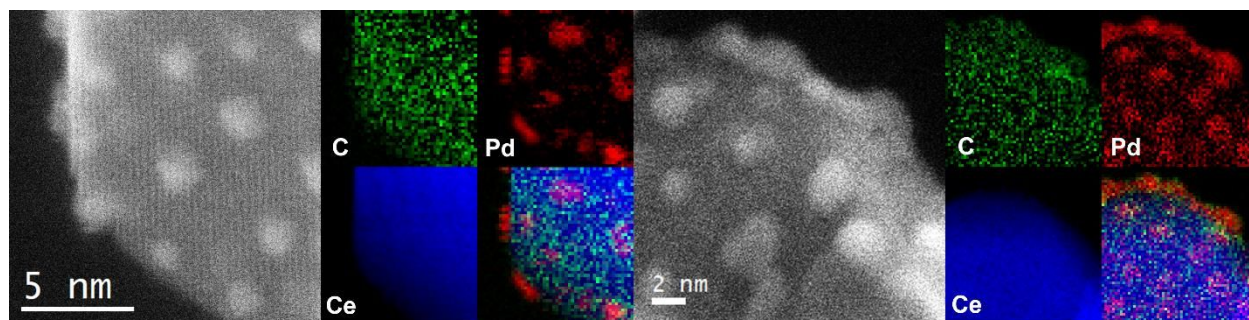

Figure S2: STEM-EELS ex situ imaging of Pd-iC-CeO<sub>2</sub> for the (left) fresh catalyst (right) after 1 hr reaction condition. Reaction Conditions: 25 mg catalyst, 0.5 M H<sub>2</sub>O<sub>2</sub> (aq), 800 rpm stir rate, 75 °C, 20 bar initial pressure.

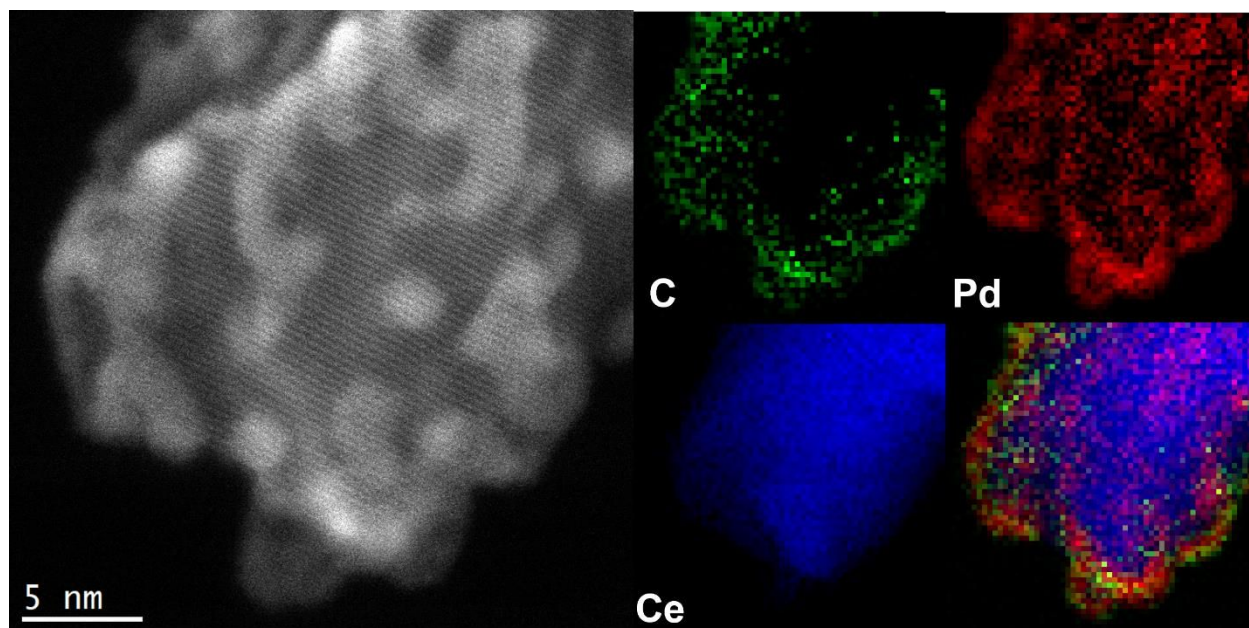

Figure S3: STEM EELS for Pd-iC-CeO<sub>2</sub> after 3 hr of reaction time Reaction conditions: 25 mg catalyst, 0.5 M H<sub>2</sub>O<sub>2</sub> (aq), 800 rpm stir rate, 75 °C, 20 bar initial pressure.

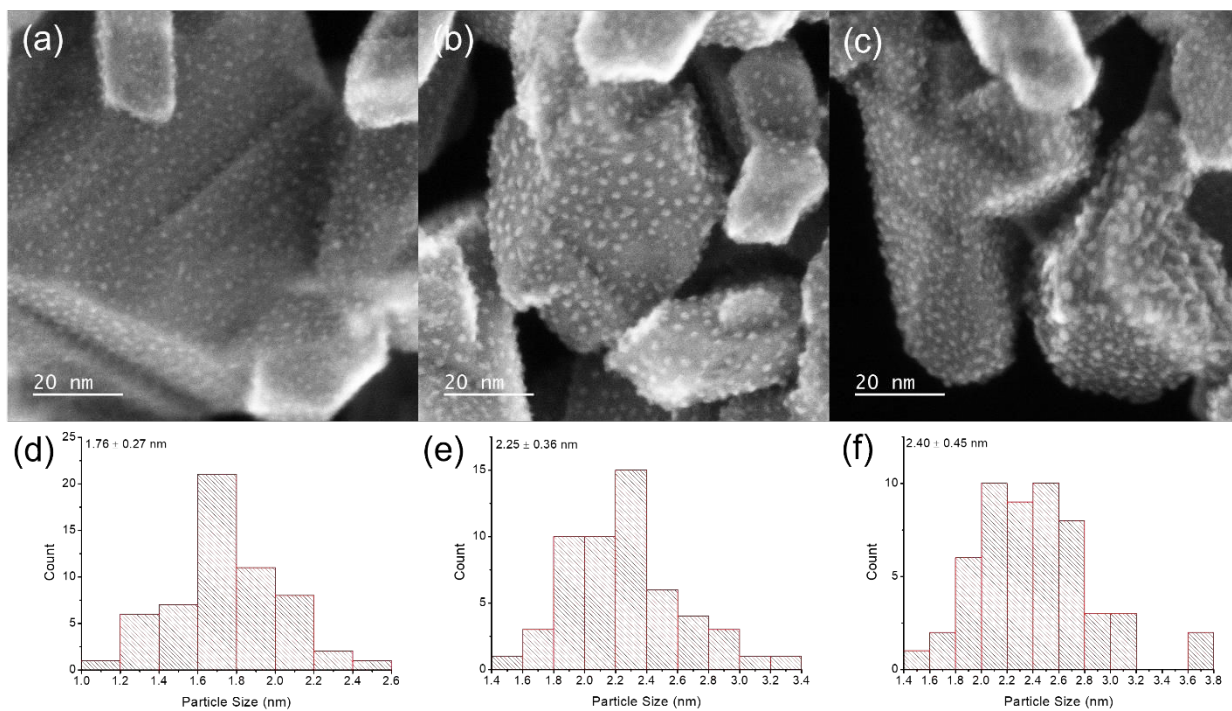

Figure S4: STEM imaging of Pd-iC-CeO<sub>2</sub> for (a) fresh as synthesized (b) after 1 hr of reaction time (c) after 3 hr of reaction time. Particle size distribution for (d) fresh sample, (e) 1 hr reaction time and (f) 3 hr of reaction time.



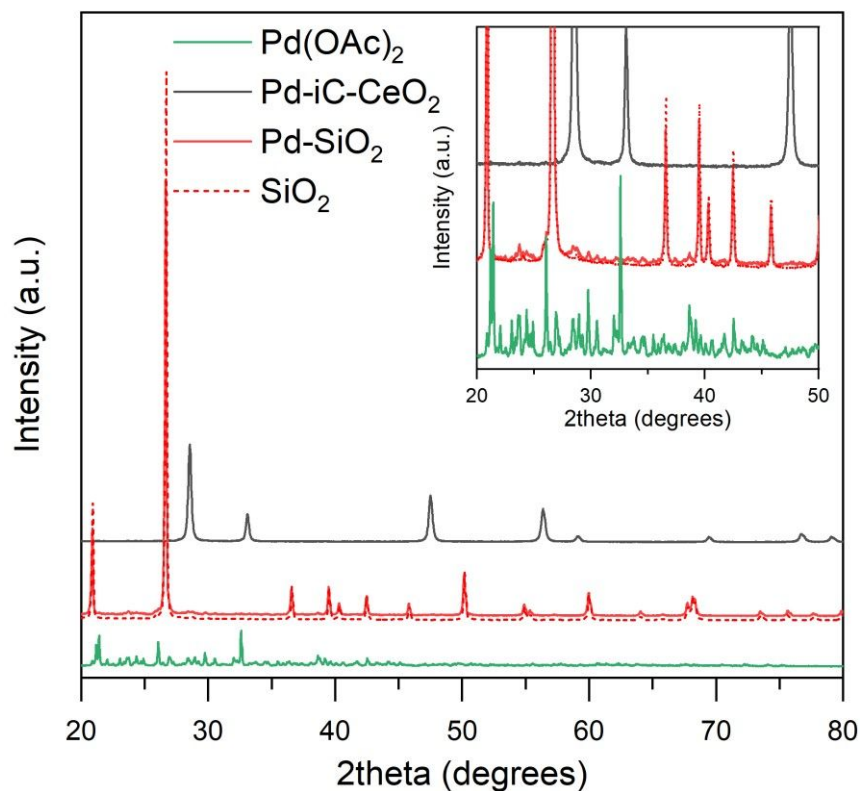

Figure S5: Diffraction patterns for ball milled palladium supported on ceria (Pd-iC-CeO<sub>2</sub>), silica (Pd-SiO<sub>2</sub>), bare silica, and Pd(OAc)<sub>2</sub> salt. Diffraction patterns of the precursor acetate salt can be observed on Pd-SiO<sub>2</sub>, while no additional Pd or Pd(OAc)<sub>2</sub> peaks are detected on Pd-iC-CeO<sub>2</sub>.

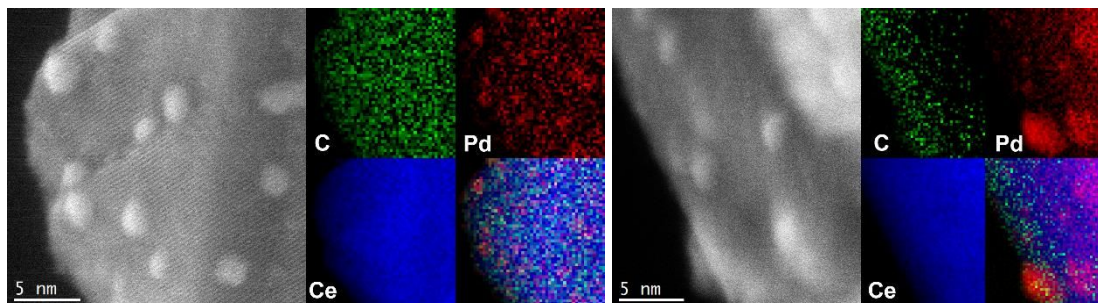

Figure S6: STEM-EELS ex situ imaging of Pd-iC-CeO<sub>2</sub> post oxidation treatment in air for 1 hr at 500 °C (left) post oxidative treatment (right) after 1 hr reaction condition. Reaction Conditions: 25 mg oxidized Pd-iC-CeO<sub>2</sub>, 0.5 M H<sub>2</sub>O<sub>2</sub> (aq), 800 rpm stir rate, 75 °C, 20 bar initial pressure.

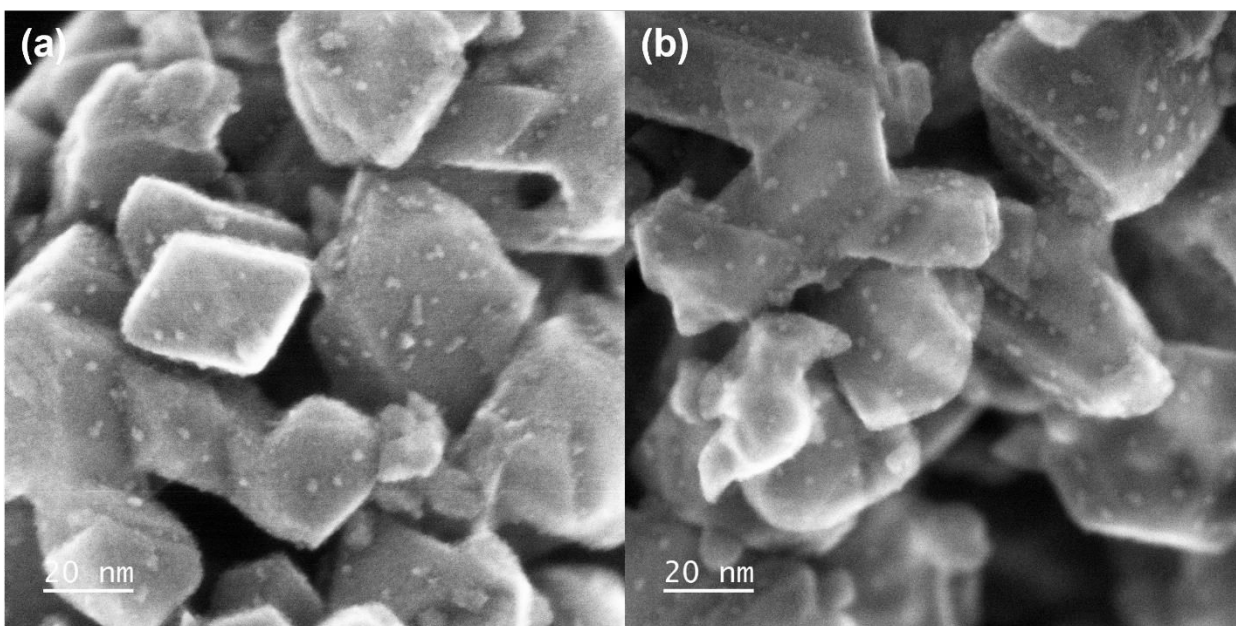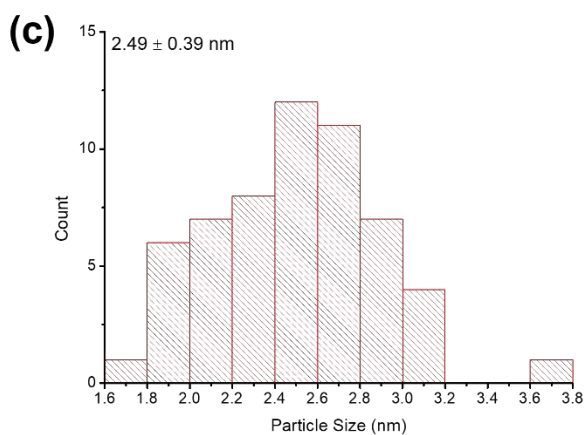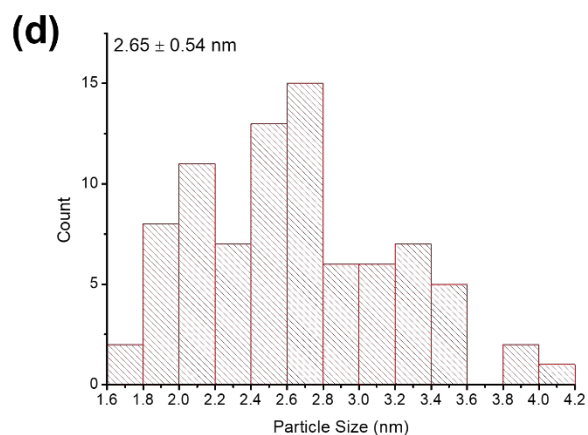

Figure S7: STEM particle sizing for Pd-iC-CeO<sub>2</sub> after (a) and oxidative treatment and (b) oxidative pretreatment and 1 hr of MtM reaction time. Particle size distribution for after (c) oxidative treatment and (d) oxidative treatment and 1 hr of MtM reaction time.

## Dispersion Calculation

Assume Pd<sup>0</sup> crystallites have an FCC structure and are semi spherical as shown in the STEM images, with the upper half exposed, the dispersion is as follows:

$$D = \frac{N_s}{N_T} = 6 \frac{V_m/a_m}{d_{VA}}$$

Where,

N<sub>s</sub> is the number of palladium atoms present on the surface

N<sub>t</sub> is the total number of palladium atoms in the catalyst

V<sub>m</sub> is the volume occupied by one palladium in the bulk

a<sub>m</sub> is the area occupied by one palladium atom on the polycrystalline surface

d<sub>VA</sub> is the mean particle diameter size of the metallic palladium via STEM

Dispersion of Pd-iC-CeO<sub>2</sub>, with an average particle size of 1.7 nm for the fresh sample and 2.4 nm for the spent 3 hr samples is **22%** and **16%**, respectively.



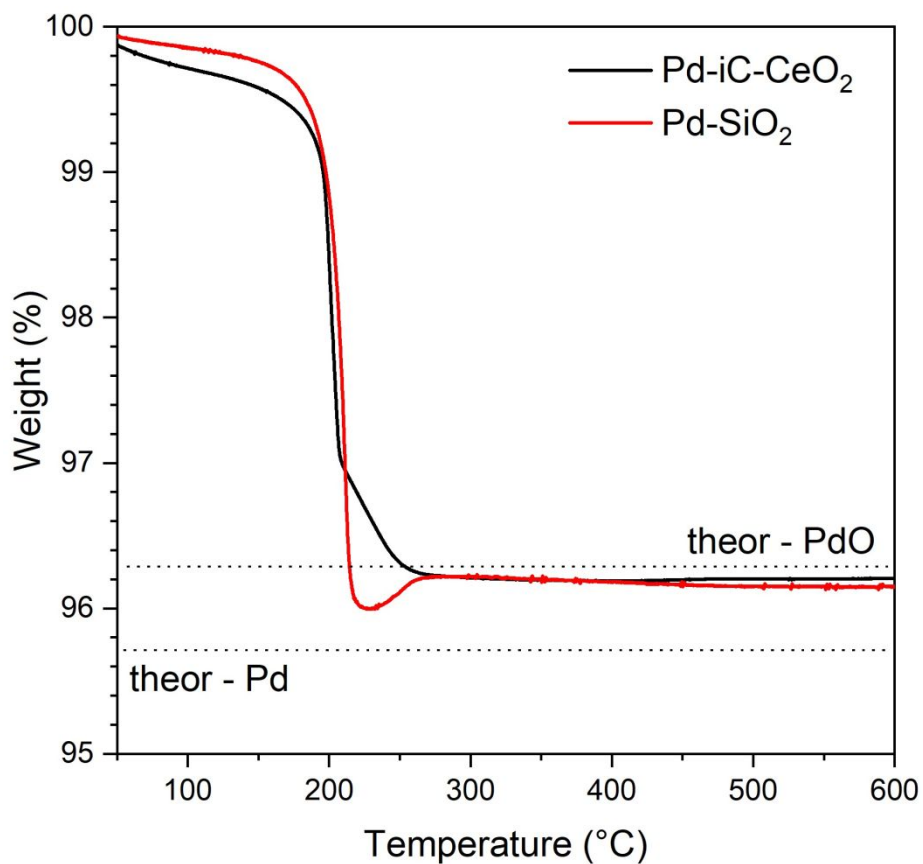

Figure S8: Thermogravimetric Analysis (TGA) of as synthesized Pd-iC-CeO<sub>2</sub> and Pd-SiO<sub>2</sub>. The decomposition of the Palladium acetate salt can be observed from the sudden weight loss at 200°C, which corresponds to a total release of the acetate ligands and the oxidation of supported Pd into PdO.

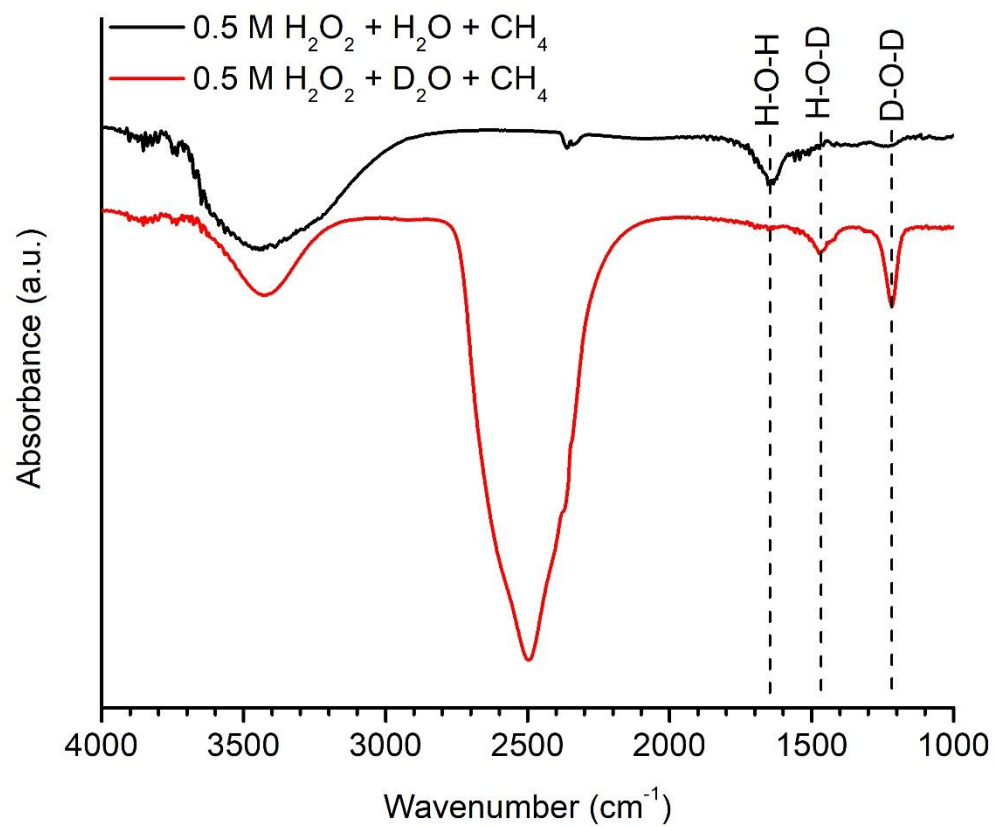

Figure S9: Full range in situ MtM ATR for Pd-iC-CeO<sub>2</sub> using either 0.5 M H<sub>2</sub>O<sub>2</sub> in deuterium or DI water.

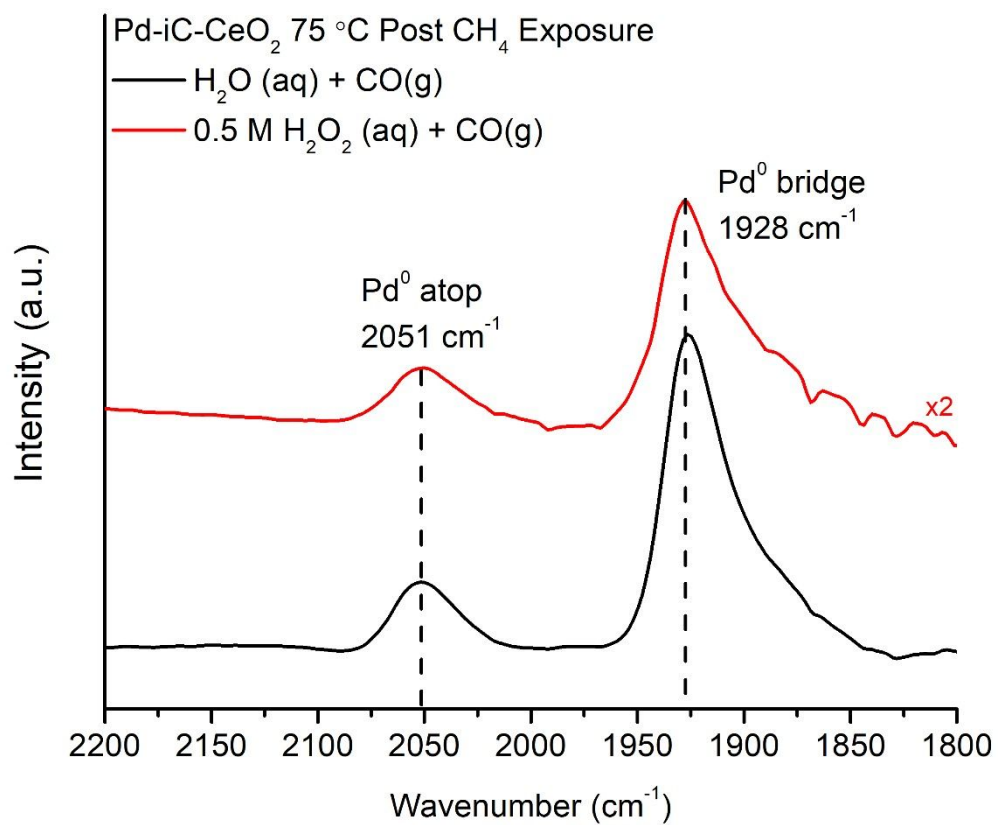

Figure S10: in situ CO-ATR at 75 °C post methane exposure in either solvent alone (H<sub>2</sub>O + CO) or full reaction conditions (0.5 M H<sub>2</sub>O<sub>2</sub> + H<sub>2</sub>O + CO).

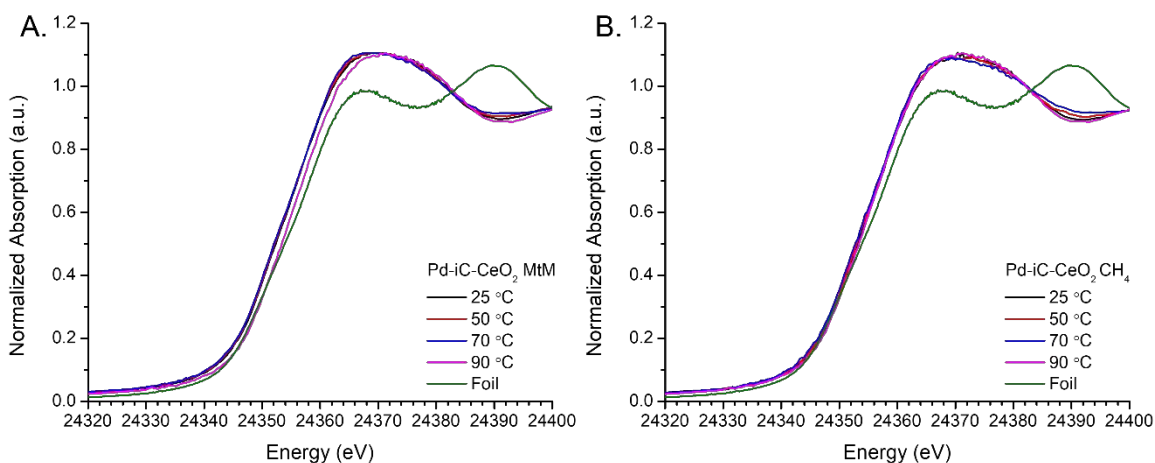

Figure S11: in situ Pd K edge XANES for Pd-iC-CeO<sub>2</sub> at 34 bar total pressure under (A) 20 bar partial pressure of methane and 0.1 M H<sub>2</sub>O<sub>2</sub> (aq) flow and (B) 20 bar partial pressure of methane and DI water. All flows were set to 0.01 mL/min and data was collected via a PIPS detector.

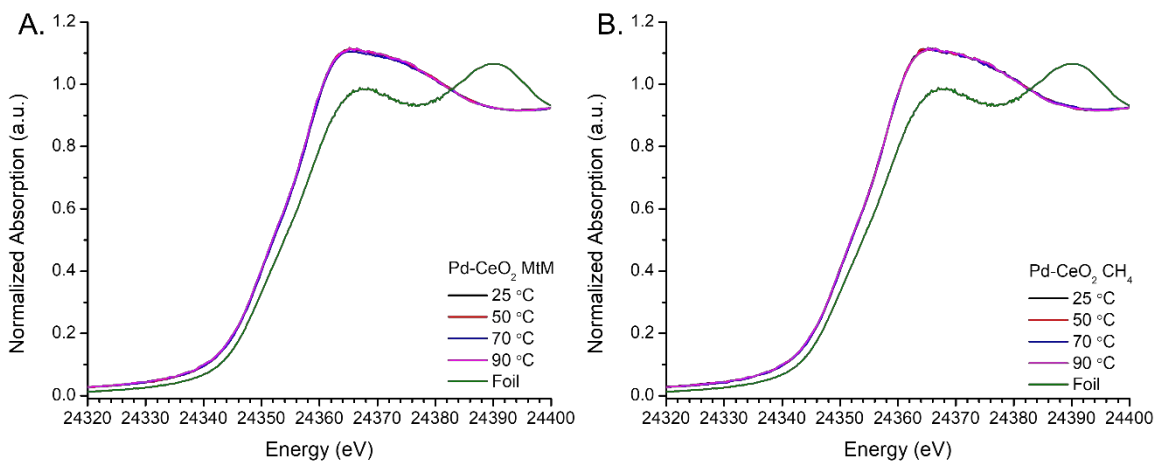

Figure S12: in situ Pd K edge XANES for Pd-CeO<sub>2</sub> at 34 bar total pressure under (A) 20 bar partial pressure of methane and 0.1 M H<sub>2</sub>O<sub>2</sub> (aq) flow and (B) 20 bar partial pressure of methane and DI water. All flows were set to 0.01 mL/min and data was collected via a PIPS detector.

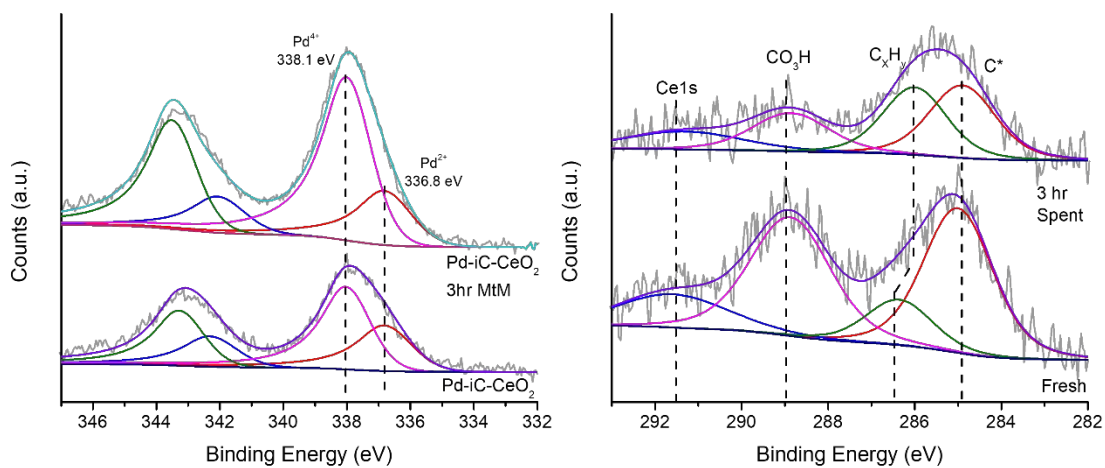

Figure S13: XPS spectra of as synthesized Pd-iC-CeO<sub>2</sub> and after 3 hr reaction time (left) Pd3d and (right) C1s.



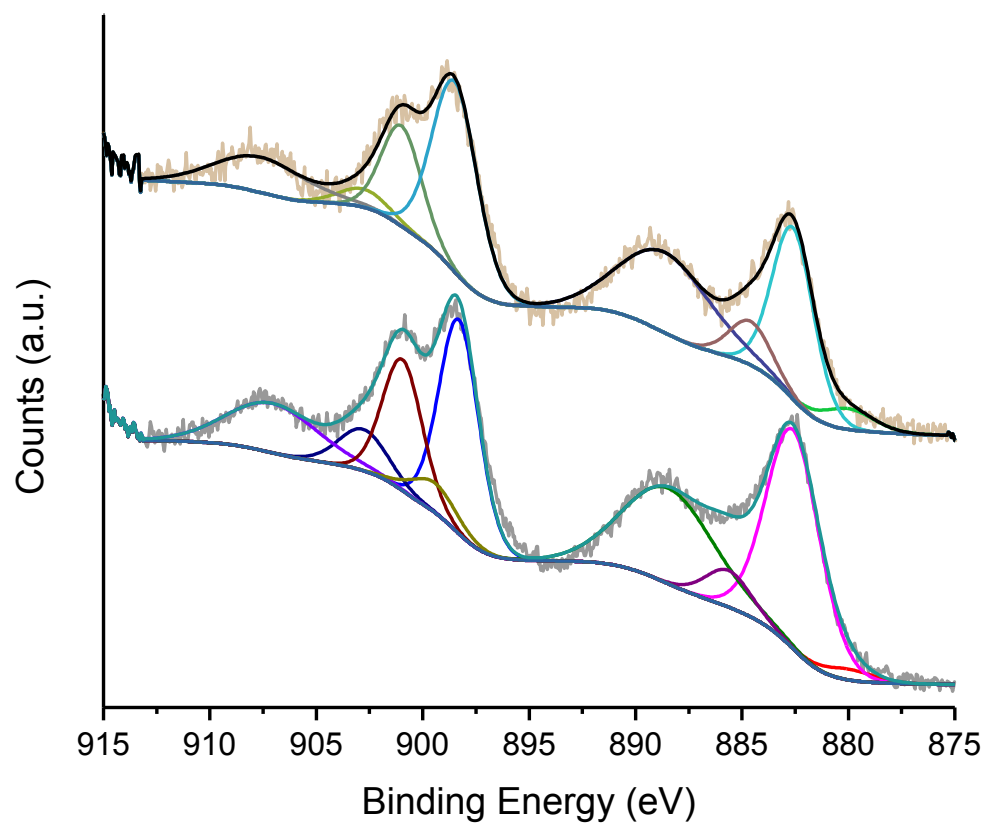

Figure S14: Ce3d ex situ XPS spectra of Pd-iC-CeO<sub>2</sub> (bottom) as synthesized and (top) after MtM reaction for 3 hr.

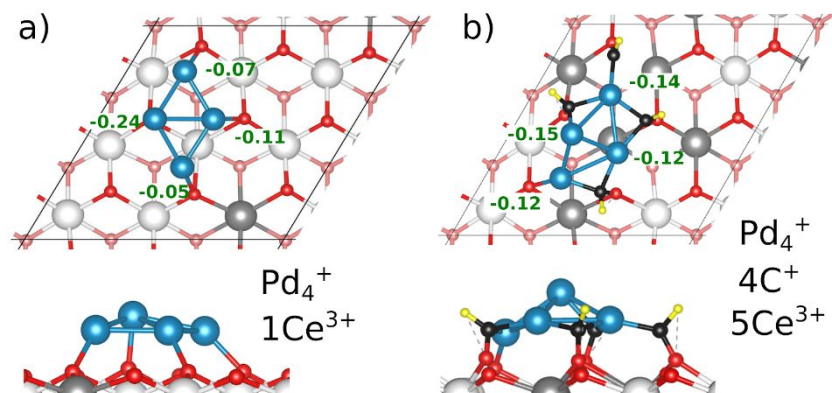

Figure S15: a) Pd-CeO<sub>2</sub> and b) Pd-iC-CeO<sub>2</sub> theoretical models used in this study. Color coding: Pd atoms are light blue, Ce<sup>4+</sup> white, Ce<sup>3+</sup> grey, O atoms of the first layer red, while those of the second layer are light red, C atoms black and H atoms yellow. The Bader charge donated by each Pd atom, relative to the Pd atom in the gas phase, is indicated in green.

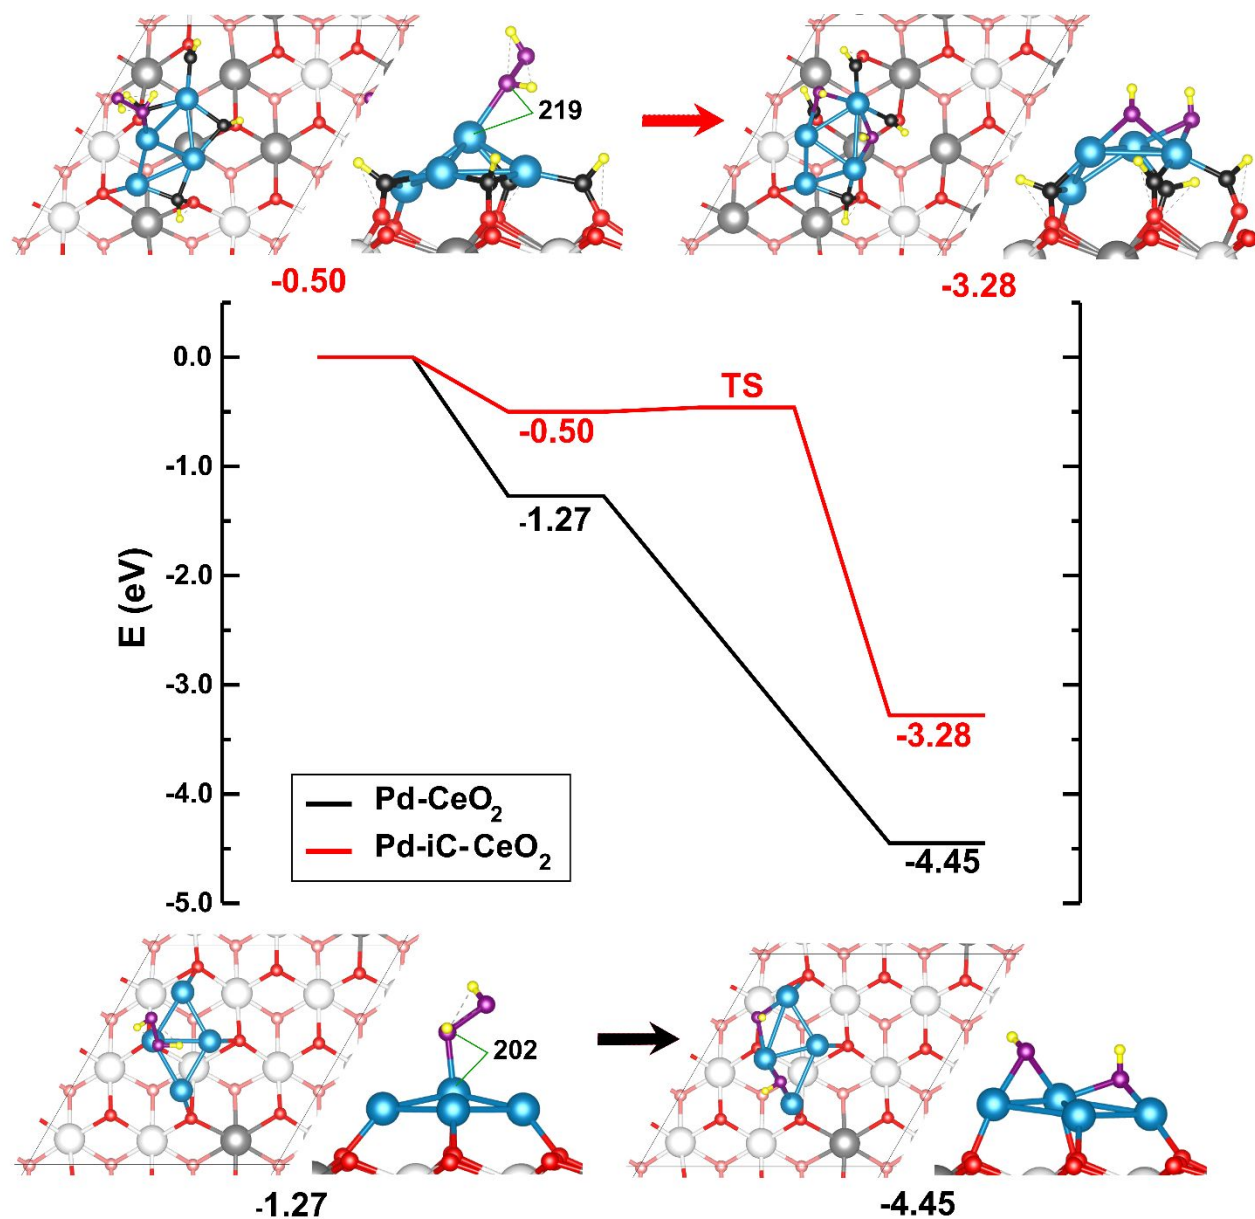

Figure S16: Activation of H<sub>2</sub>O<sub>2</sub> on Pd-CeO<sub>2</sub> (black path) and Pd-iC-CeO<sub>2</sub> (red path). In the case of the molecular adsorbed state the H-Pd distance is indicated in pm. The adsorption energy of each stable state and the activation energy associated with the transition states relative to their precursor states are included.

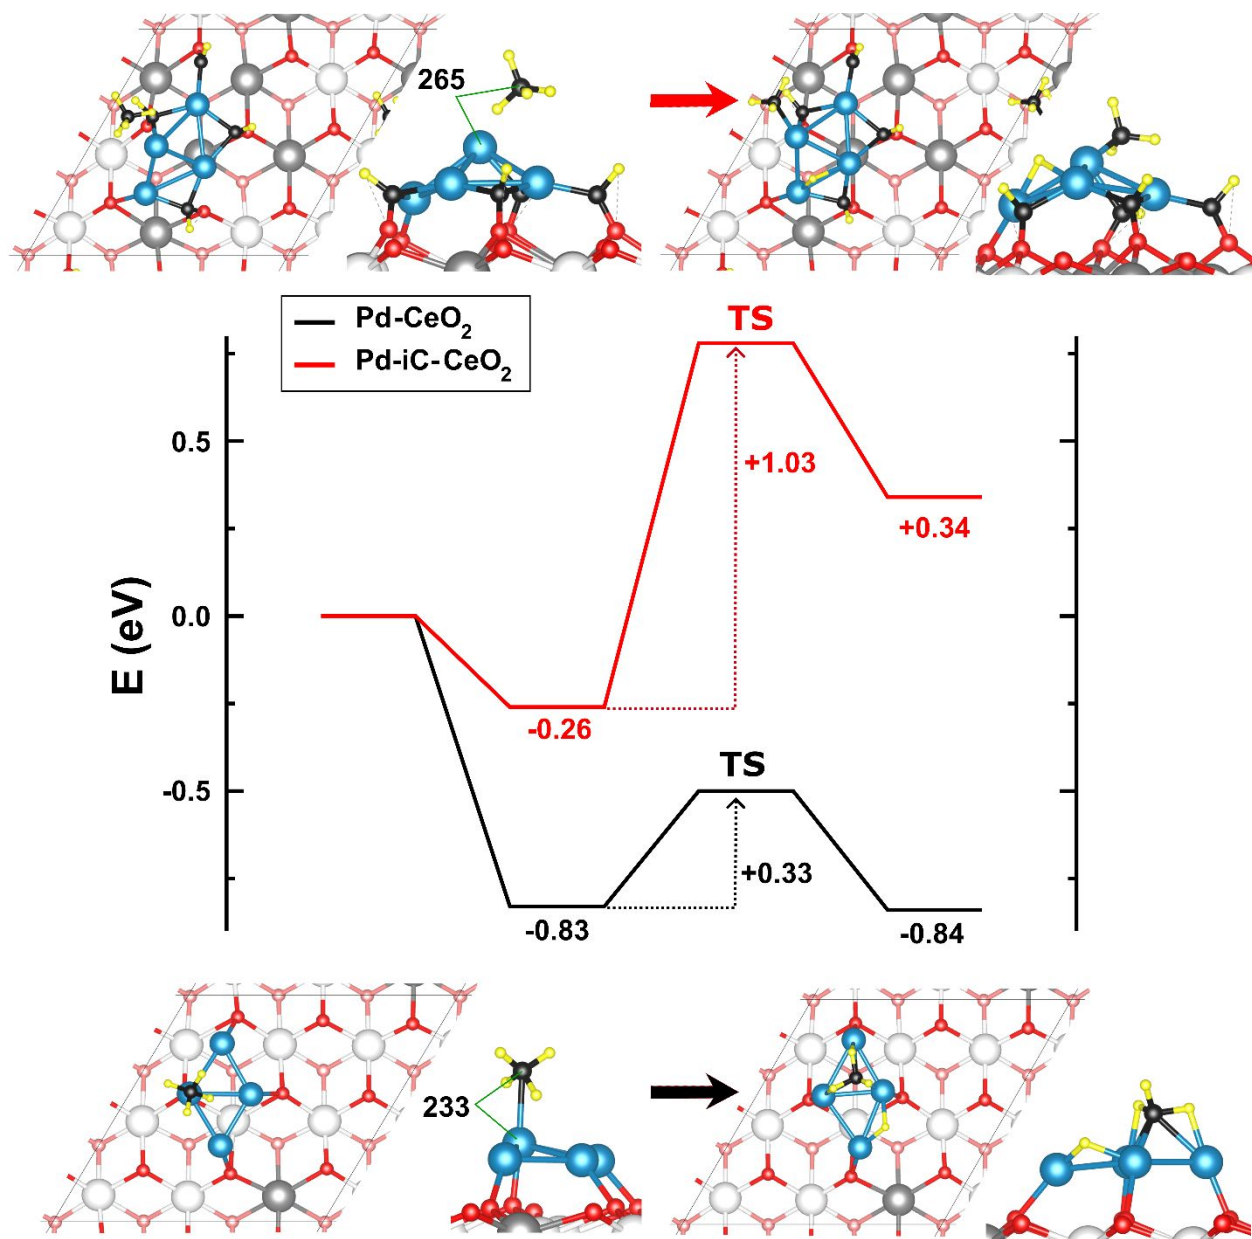

Figure S17: Activation of CH<sub>4</sub> on Pd-CeO<sub>2</sub> (black path) and Pd-iC-CeO<sub>2</sub> (red path). In the case of the molecular adsorbed state the C–Pd distance is indicated in pm. The adsorption energy of each stable state and the activation energy associated with the transition states relative to their precursor states are included.

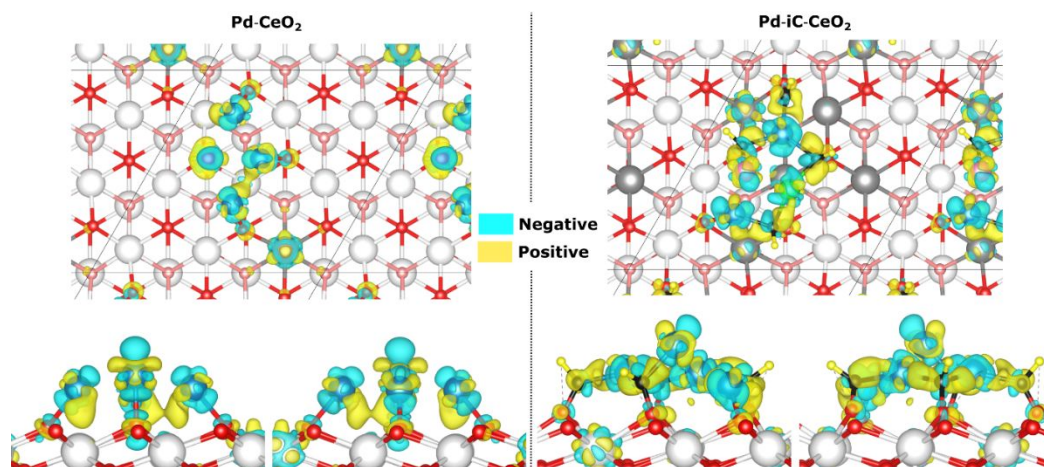

Figure S18: Top (upper) and side (bottom) views of the charge density difference plots (CDDP) for two model catalysts: Pd-CeO<sub>2</sub> and Pd-iC-CeO<sub>2</sub>. The CDDP is computed as follows:  $\rho(\text{Pd-CeO}_2/\text{Pd-iC-CeO}_2) - \rho(\text{CeO}_2/\text{iC-CeO}_2) - \rho(\text{Pd}_{\text{gas}})$ . Positive/negative differences ( $\Delta\rho$ ) are visually represented using yellow/cyan colors.

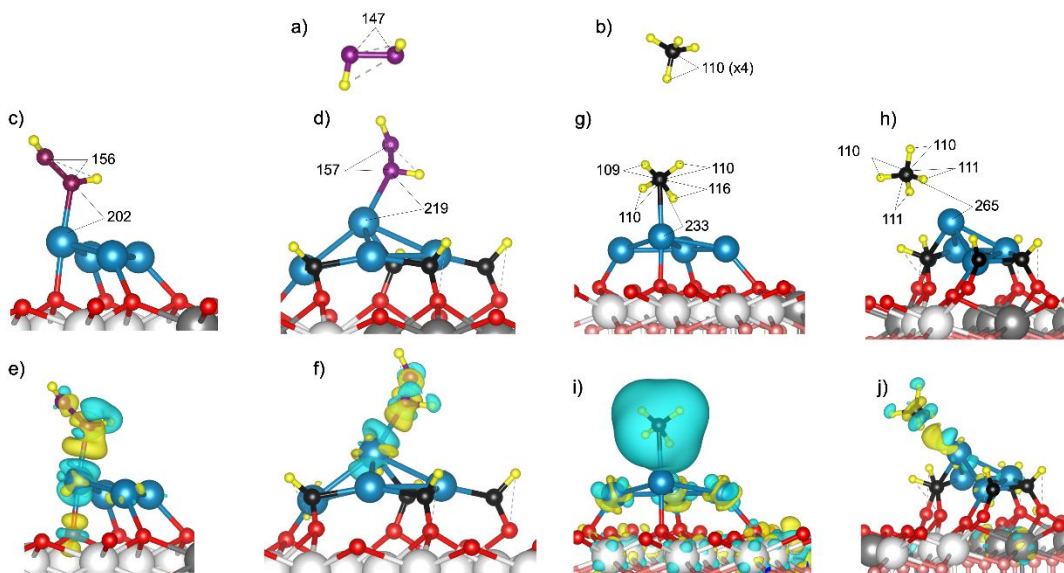

Figure S19: (a) and (b) show the isolated structures of H<sub>2</sub>O<sub>2</sub> and CH<sub>4</sub>, respectively, with bond lengths in picometers. (c) and (d) display the adsorption geometries of H<sub>2</sub>O<sub>2</sub> on Pd-CeO<sub>2</sub> and Pd-iC-CeO<sub>2</sub>, respectively, indicating bond lengths and changes upon adsorption. (e) and (f) illustrate the charge density difference plots (CDDP) upon H<sub>2</sub>O<sub>2</sub> adsorption on Pd-CeO<sub>2</sub> and Pd-iC-CeO<sub>2</sub>, respectively. (g) and (h) show the adsorption geometries of CH<sub>4</sub> on Pd-CeO<sub>2</sub> and Pd-iC-CeO<sub>2</sub>, respectively, indicating bond lengths and changes upon adsorption. (i) and (j) illustrate the CDDP upon CH<sub>4</sub> adsorption on Pd-CeO<sub>2</sub> and Pd-iC-CeO<sub>2</sub>, respectively. The CDDP is computed as follows:  $\rho(\text{H}_2\text{O}_2/\text{CH}_4/\text{Catal.}) - \rho(\text{Catal.}) - \rho(\text{H}_2\text{O}_2_{\text{gas}}/\text{CH}_4_{\text{gas}})$ . Positive/negative differences ( $\Delta\rho$ ) are visually represented using yellow/cyan colors.



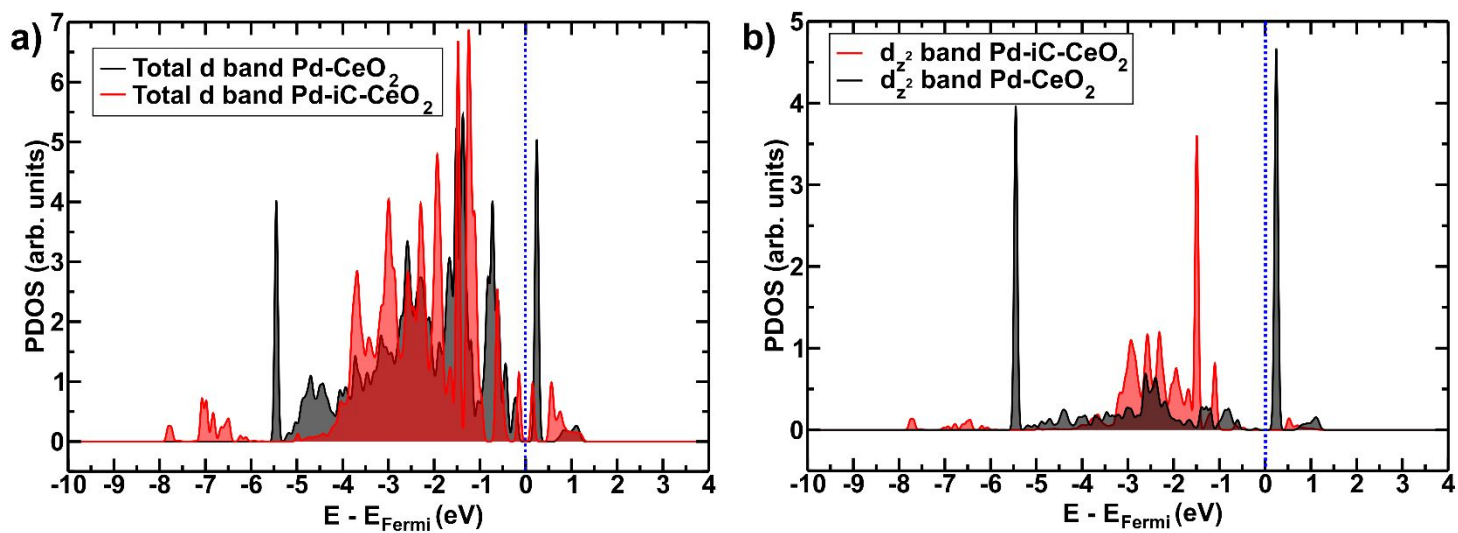

Figure S20: a) d-projected density of states (PDOS) and b)  $d_{z^2}$ -projected DOS on the Pd atom over which  $\text{CH}_4$  and  $\text{H}_2\text{O}_2$  dissociate on Pd-CeO<sub>2</sub> and Pd-iC-CeO<sub>2</sub> (Fig. S17 and S18). The PDOS are referenced to the Fermi energy which is indicated in the blue dotted line.

## Mechanism of methanol formation on Pd-CeO<sub>2</sub>

Figure S21 illustrates the mechanism found for methanol formation on the Pd-CeO<sub>2</sub> model catalyst, and Figure S22 shows images corresponding to each reported stable state.

As H<sub>2</sub>O<sub>2</sub> adsorbs more strongly than CH<sub>4</sub> and activates without barrier, we have started with (a), the adsorption of H<sub>2</sub>O<sub>2</sub> with an energy of -1.27 eV and (b), followed by the activation of the H<sub>2</sub>O<sub>2</sub> molecule, resulting in the final state of 2OH adsorbed (2OH\*) adsorbed on Pd with energy of -4.45 eV (see Figure 20b).

Then, methane was adsorbed in the presence of the 2OH\* with an energy of -0.18 eV (step (c) in Figure S21 and state (c) in Figure S22). It is notable that the CH<sub>4</sub> adsorption energy decreases by 0.65 eV (0.83 - 0.18 eV) compared to the hydroxyl-free case. The final state: (d) CH<sub>3</sub>\*+H\*+2OH\* where all species are dissociatively adsorbed on Pd, has an energy of -4.10 eV. This step is endothermic by 0.53 eV (-4.10 - (-4.63) eV). Calculation of the activation barrier (E<sub>act</sub>) showed no transition state (TS), thus the activation energy of (c) CH<sub>4</sub>\*+2OH\* to (d) CH<sub>3</sub>\*+H\*+2OH\* equals the reaction energy of 0.53 eV. This value is by 0.2 eV larger compared to the case of the surface without a dissociatively pre-adsorbed H<sub>2</sub>O<sub>2</sub> molecule (cf. Figure S17).

At this point we already have the necessary ingredients (CH<sub>3</sub>\* and OH\*) to form CH<sub>3</sub>OH. Then, we evaluated the path from (d) CH<sub>3</sub>\*+H\*+2OH\* to (d') CH<sub>3</sub>OH\*+H\*+OH (red dotted path Figure S21) and found an activation barrier of E<sub>act</sub>=1.53 eV. In addition to this high activation barrier the process is endothermic with a reaction energy of E<sub>react</sub>=+0.16 eV, which indicates that even if CH<sub>3</sub>OH were formed it would tend to dissociate into CH<sub>3</sub>\*+OH\* since the reverse activation barrier is lower (1.37 eV). Since this path is not possible, a second H<sub>2</sub>O<sub>2</sub> molecule was adsorbed and activated between the (e) CH<sub>3</sub>\*+H\*+2OH\*+H<sub>2</sub>O<sub>2</sub>\* and (f) CH<sub>3</sub>\*+H\*+2OH\*+OH<sub>int</sub>\*+H<sub>2</sub>O\* states. Note that the second H<sub>2</sub>O<sub>2</sub> does not dissociate into 2OH\*, but forms with the H\* a H<sub>2</sub>O molecule, leaving also an OH adsorbed at the PdCeO<sub>2</sub> interface (OH<sub>int</sub>). This process has an activation barrier of 0.80 eV and is 2.90 eV exothermic. Thus, it is concluded that it is more feasible to adsorb and activate a second H<sub>2</sub>O<sub>2</sub> molecule than to form CH<sub>3</sub>OH.

Continuing from state (f), the formation of methanol was newly considered, finding a state (f') with an energy of -7.54 eV, so the reaction energy of this step is -0.33 eV but the activation barrier is 1.40 eV. This result is promising because the reaction energy is exothermic, and the activation barrier is lower than that found in methanol formation between steps (d) and (d') of 1.53 eV. Likewise, the adsorption and activation of a third H<sub>2</sub>O<sub>2</sub> molecule corresponding to the states (g) 2OH\*+CH<sub>3</sub>\*+H\*+OH<sub>int</sub>\*+H<sub>2</sub>O\*+H<sub>2</sub>O<sub>2</sub>\* and (h) 3OH+CH<sub>3</sub>\*+H\*+2OH<sub>int</sub>\*+H<sub>2</sub>O\* were analyzed. In this step, H<sub>2</sub>O<sub>2</sub>\* dissociates into OH\*+OH<sub>int</sub>\*. As seen in Figure S21, nearly 1 eV is gained by adsorbing H<sub>2</sub>O<sub>2</sub>\*, and its dissociated products produce an exothermic energy of 2.06 eV with an E<sub>act</sub> = 0.62 eV. Therefore, in this last step, the reaction would continue.

Finally, considering the proposed model, there is no more available space to dissociate a third H<sub>2</sub>O<sub>2</sub> molecule without interacting with CH<sub>3</sub>\*. This aspect will be further explored later with the inclusion of an aqueous environment. Consequently, the formation of CH<sub>3</sub>OH was calculated from

state (h), finding a state (i) with an energy of  $-10.45$  eV and an  $E_{\text{react}} = -0.21$  eV. The calculation of the reaction path in this step showed an  $E_{\text{act}} = 1.21$  eV, the lowest obtained so far for the formation of  $\text{CH}_3\text{OH}$ . Ultimately, the energy required to desorb  $\text{CH}_3\text{OH}$  is  $1.14$  eV (state (j) in Figure S21).

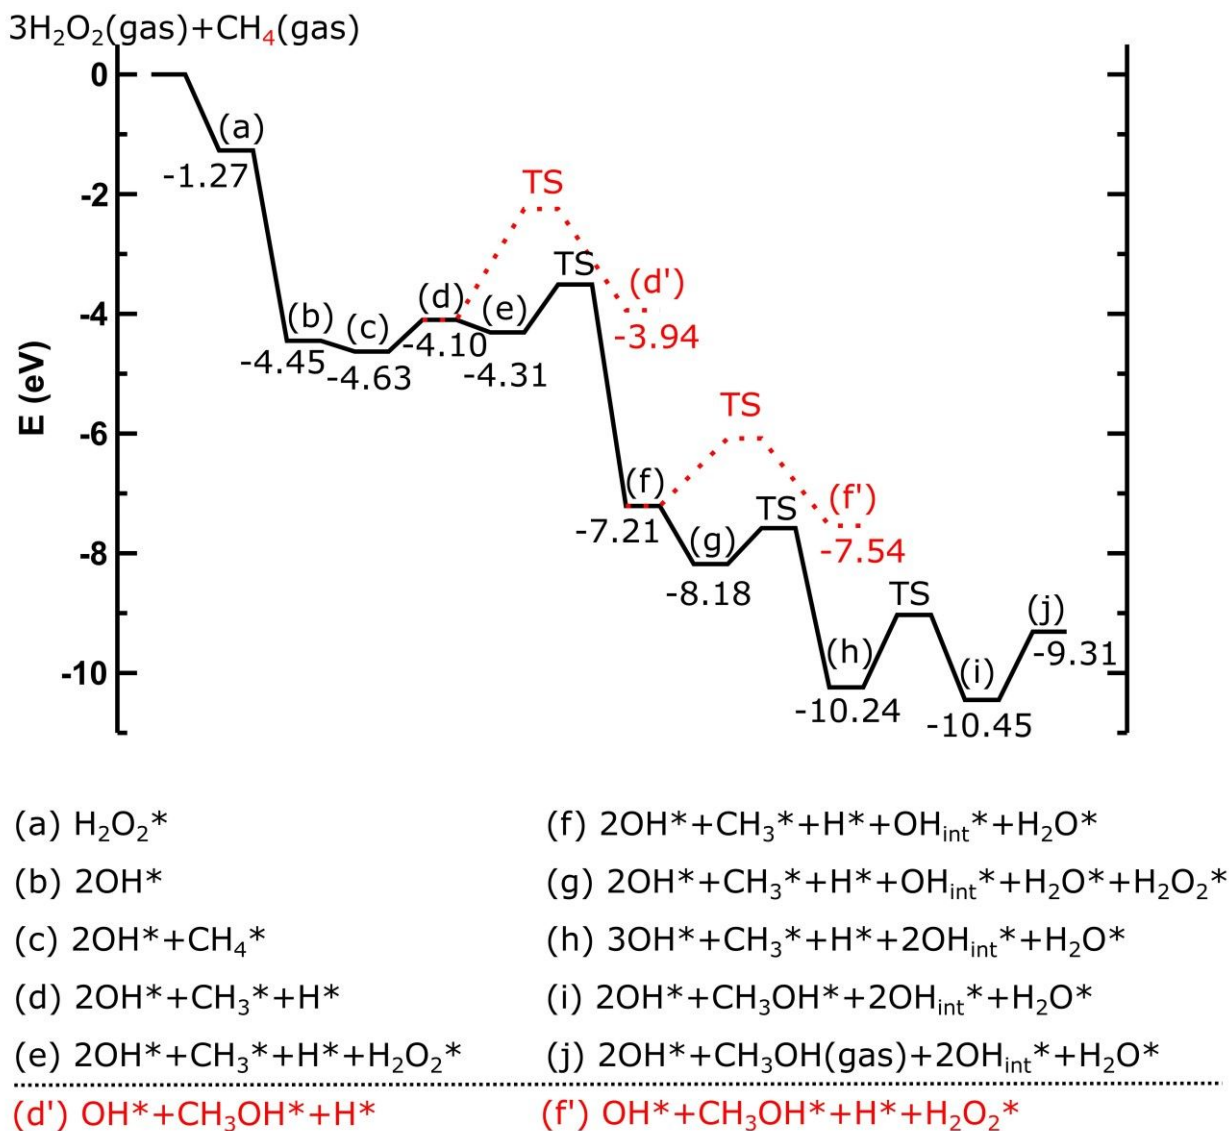

Figure S21: Hydrogen peroxide-assisted methane to methanol formation on Pd-CeO<sub>2</sub>. The red dotted lines correspond to evaluations of pathways to methanol formation that were discarded because of their high activation barrier. The adsorption energy of each stable state and the activation energy associated with the transition states relative to their precursor states are included.

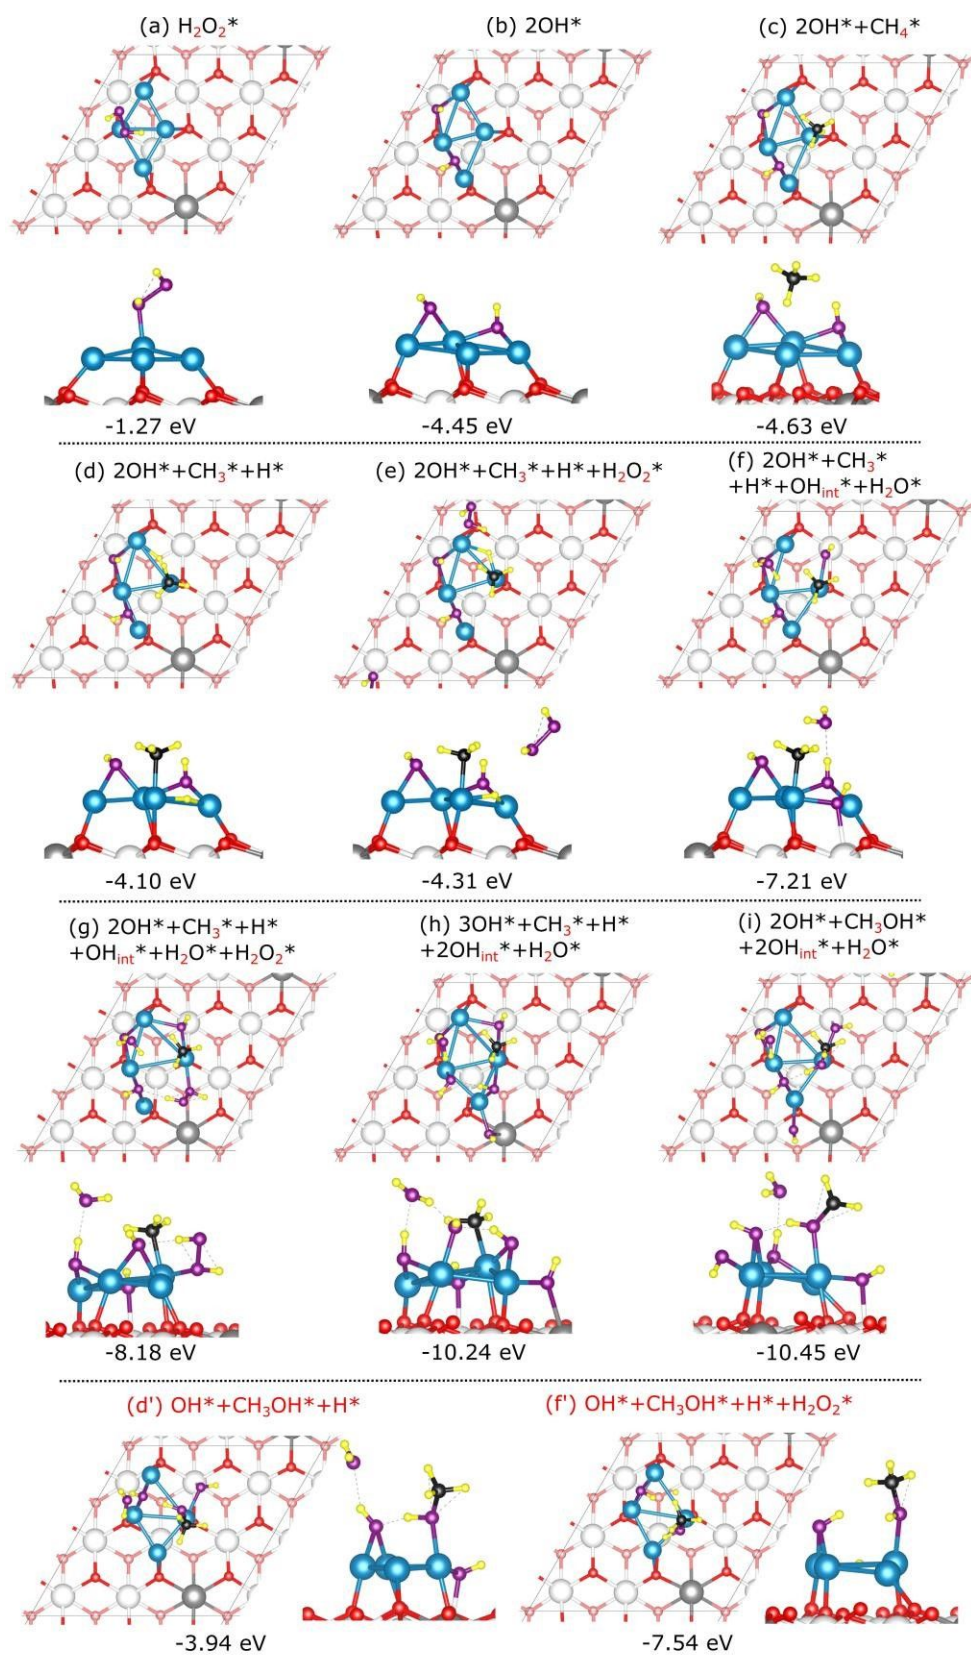

Figure S22: Top and side view of the states belonging to the reaction mechanism in Figure S21.

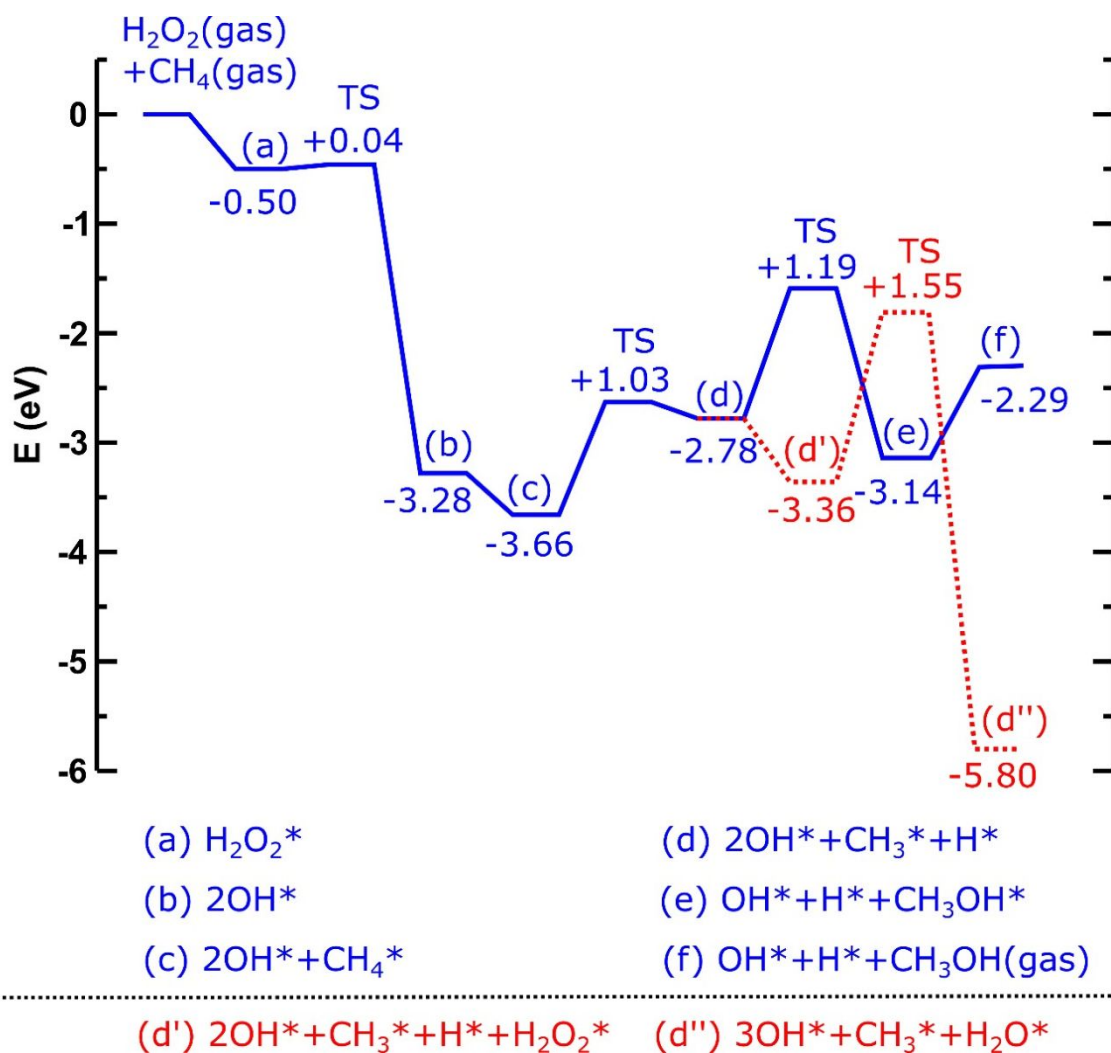

Figure S23: Hydrogen peroxide-assisted methane to methanol formation on Pd-iC-CeO<sub>2</sub>. The red dotted lines correspond to evaluations of pathways to H<sub>2</sub>O<sub>2</sub> activation that was discarded because of the high activation barrier. The adsorption energy of each stable state and the activation energy associated with the transition states relative to their precursor states are included.



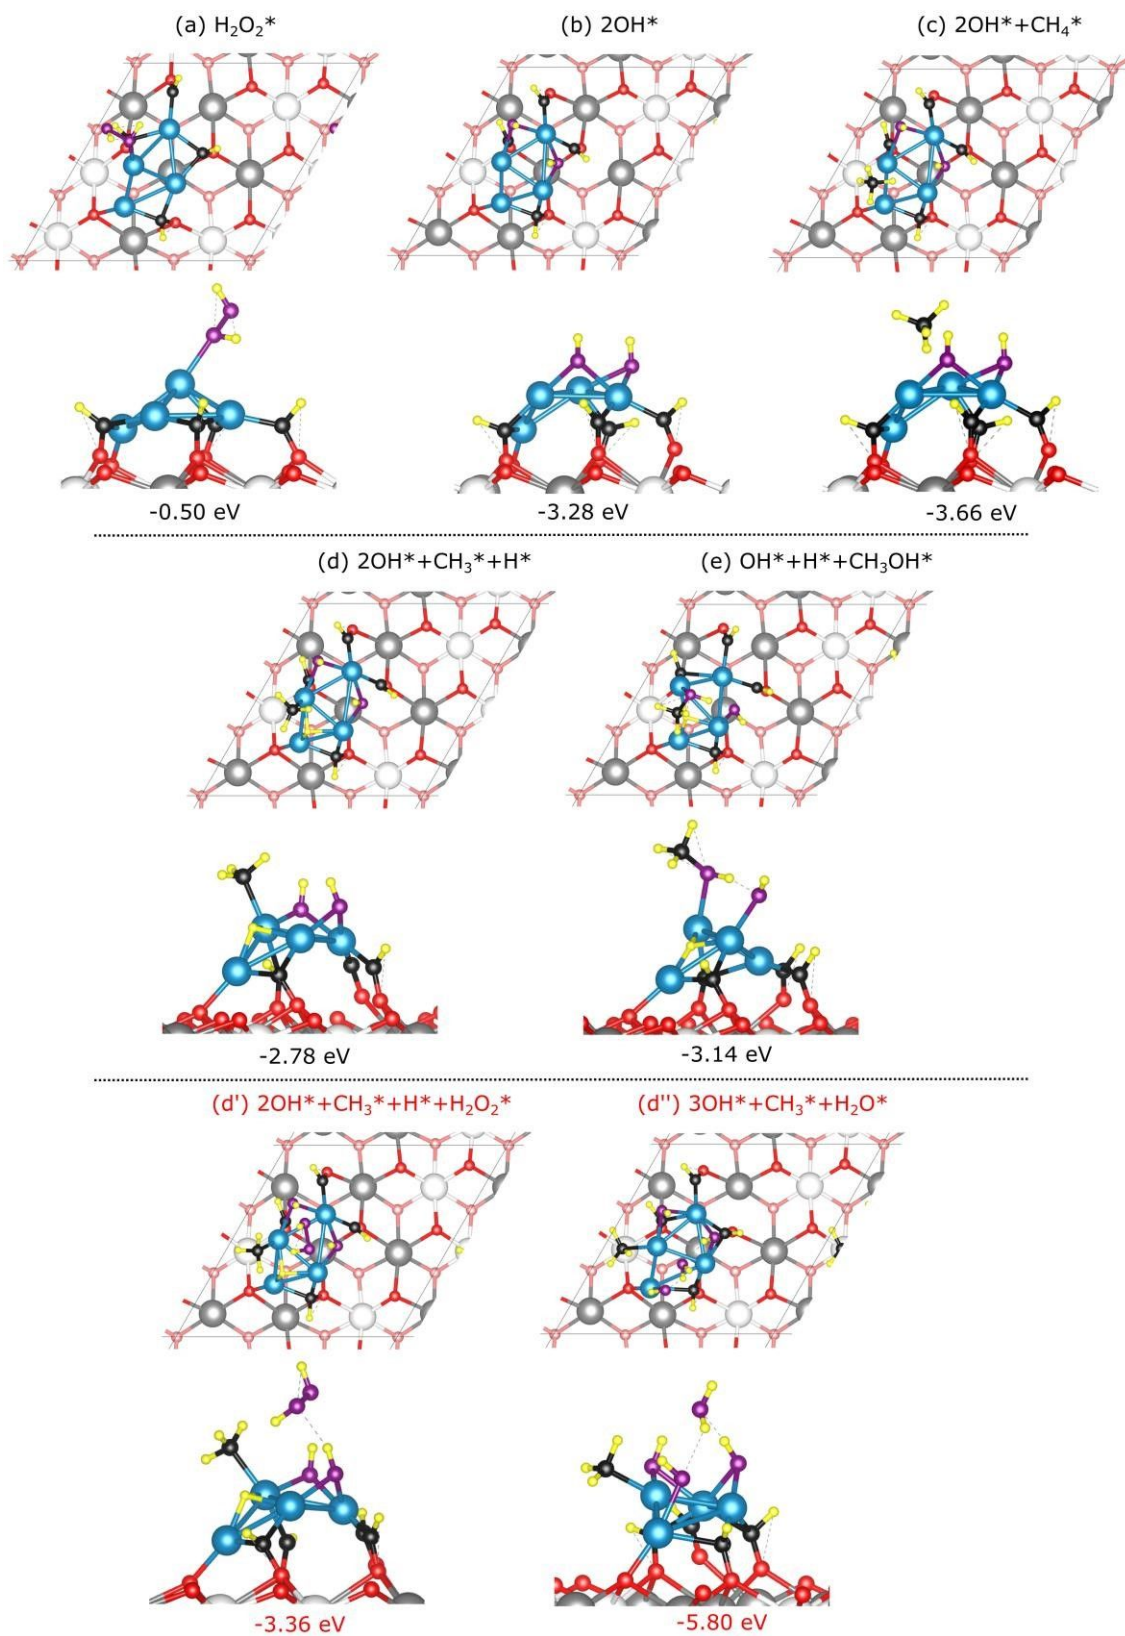

Figure S24: Top and side view of the states belonging to the reaction mechanism in Figure S23.

### Initial Structures

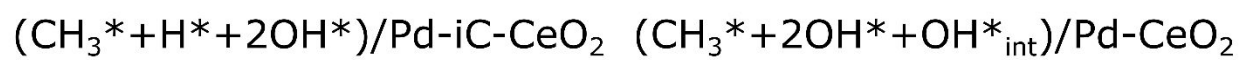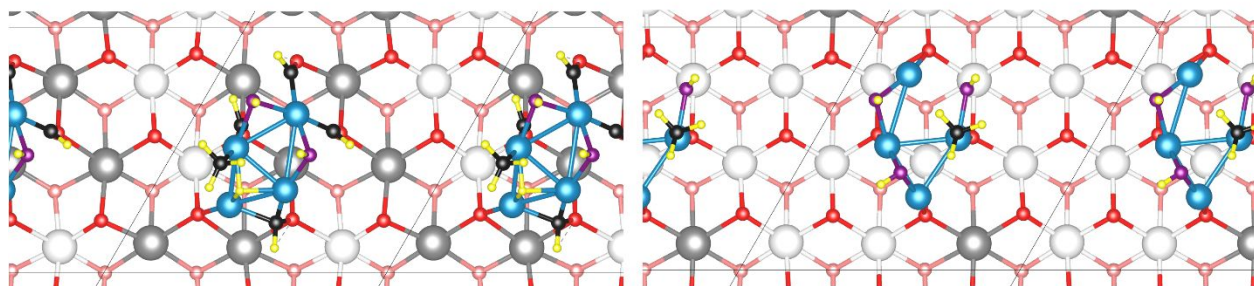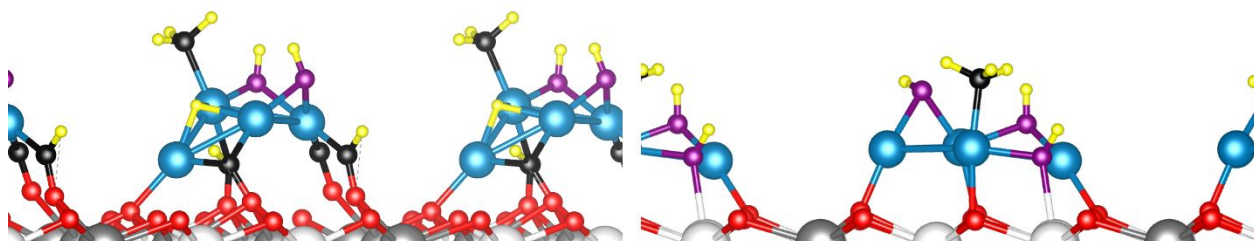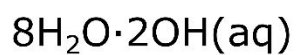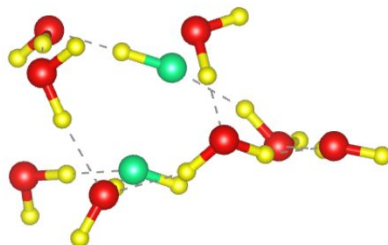

Figure S25: Initial structures for the study of the Eley-Rideal mechanism for  $\text{CH}_3\text{OH}$  formation. Oxygen atoms belonging to the solvated OH are shown in green.

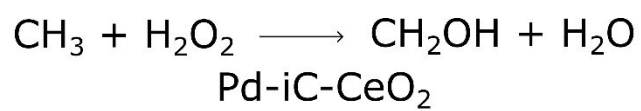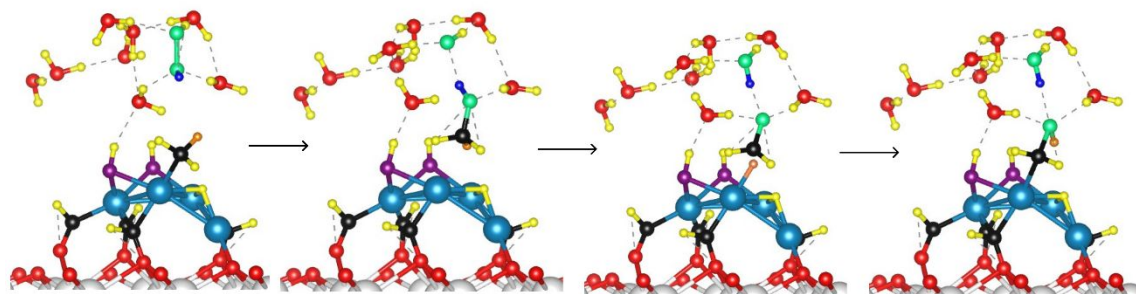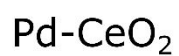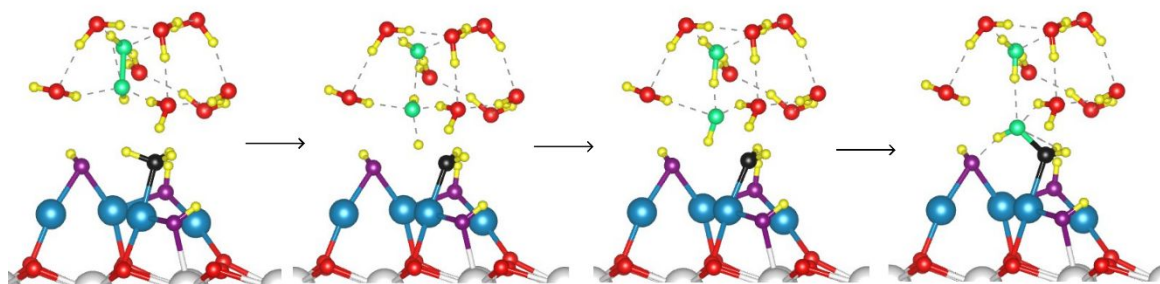

Figure S26: States involved in the formation of CH<sub>2</sub>OH over the model catalysts studied.

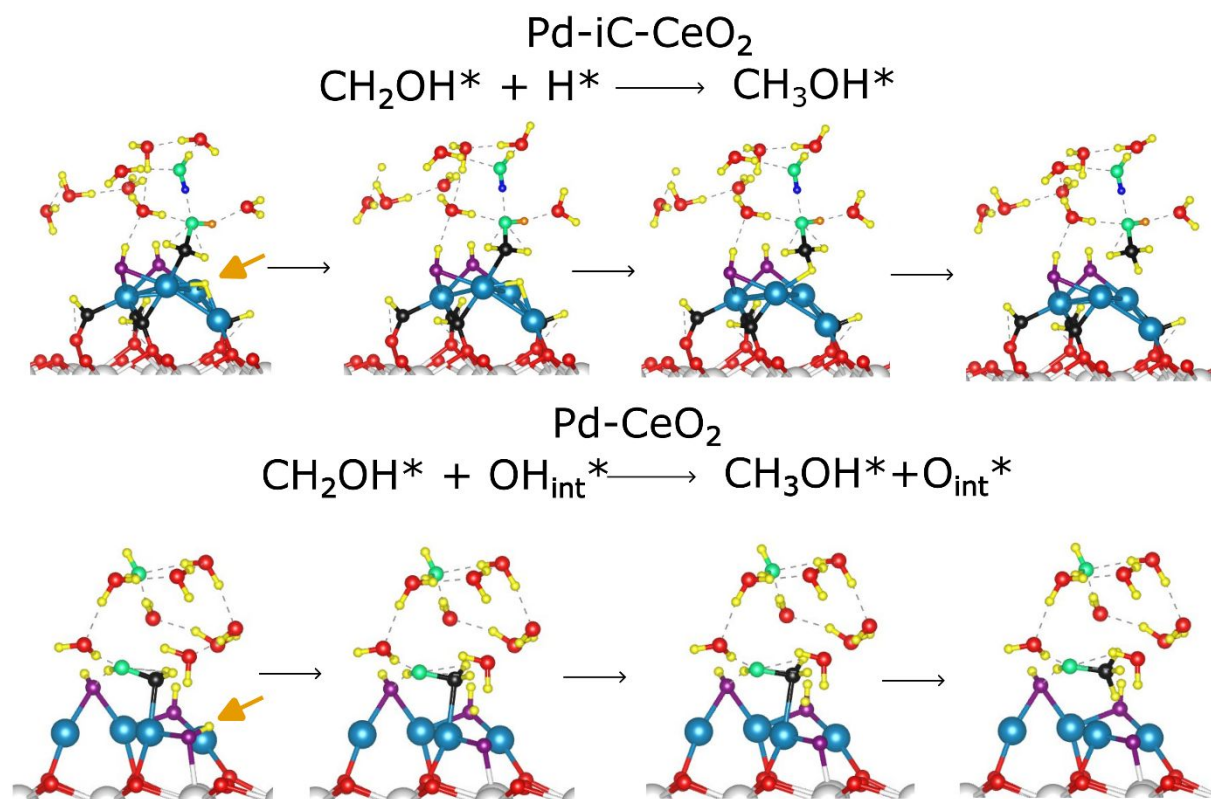

Figure S27: Step for the formation of CH<sub>3</sub>OH. The orange arrow at the beginning of both pathways points to the H involved in the formation of methanol.



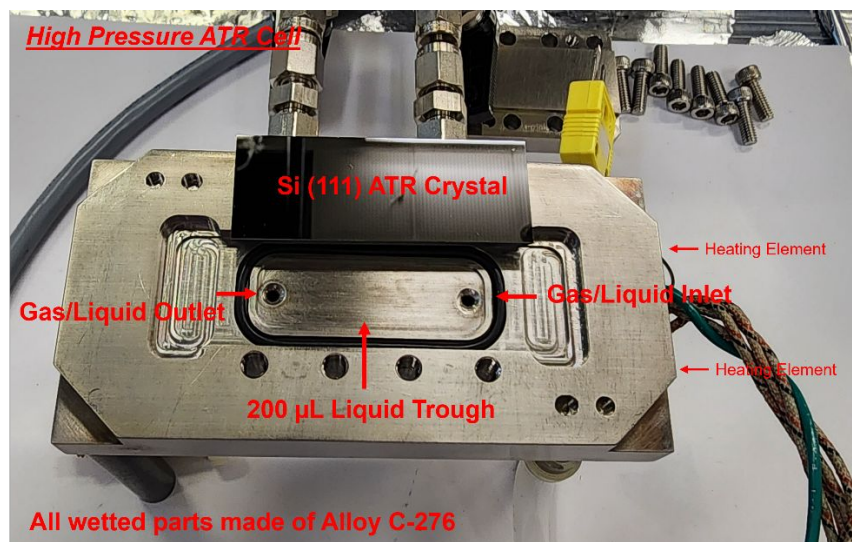

Fig. S28. High pressure commercial ATR-IR cell configuration (Harrick, Horizon Multiple Reflection ATR Unit). Catalyst drop cast onto a 50 x 20 x 2 mm Si (111) ATR crystal using a slurry of catalyst and DI water to mirror solvent conditions. System shown in upside-down configuration for assembly, and all wetted parts are constructed from Alloy C-276 to prevent degradation. K type thermocouple located immediately behind the trough within the body of the cell. MCT detector used for analysis.

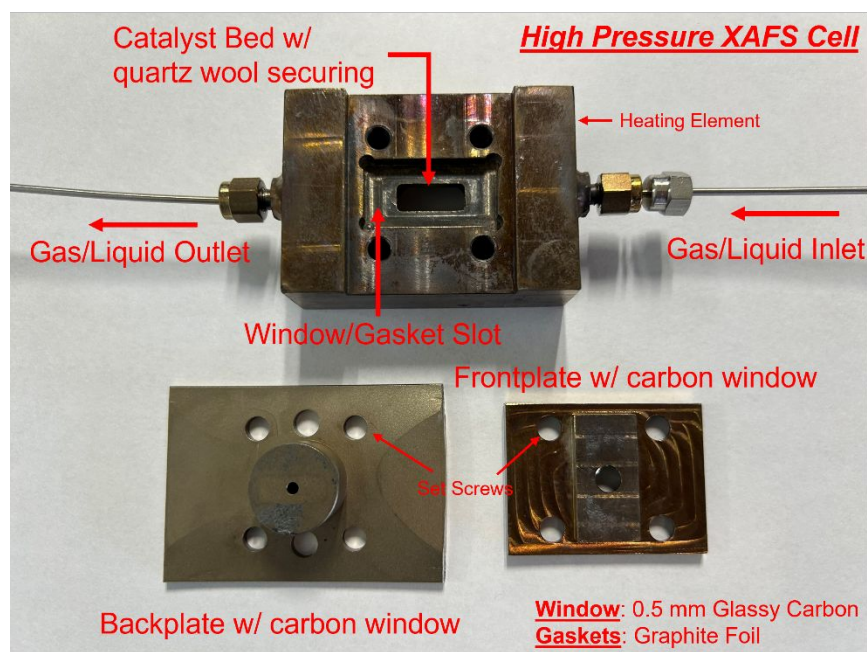

Fig. S29. Detailed schematic of high pressure in situ XAFS cell. Pressure is applied via two backpressure regulators for a working total of 34 bar, catalyst secured in bed with quartz plugs. Measurement Conditions: 34 bar pressure total, either pure DI H<sub>2</sub>O flow or 0.1 M H<sub>2</sub>O<sub>2</sub> (aq) flow saturated with 20 bar of methane, temperature varied between 25 – 90 °C, 0.1 mL/min total flow via HPLC pump, PIPs fluorescence detector, beamline 8-ID flux.
